# Supplementary material for: Comparative Genomics Insights into a Novel Biocontrol Agent Paenibacillus peoriae Strain ZF390 against Bacterial Soft Rot
Source: MDPI journal article supplement (doi:10.3390/biology11081172), 2022-08-04
Supplement: s1 [file s1]

**Supplementary Table S4** Number of genes associated with general COG functional categories.

| Description                               |                                                              | Chromosome value | pPlas1 value | pPlas2 value | pPlas3 value | Total value |
|-------------------------------------------|--------------------------------------------------------------|------------------|--------------|--------------|--------------|-------------|
| <b>Cellular processes and signaling</b>   |                                                              | <b>1028</b>      | <b>7</b>     | <b>3</b>     | <b>3</b>     | <b>1041</b> |
| D                                         | Cell cycle control, Cell division, chromosome partitioning   | 66               | 0            | 0            | 0            | 66          |
| M                                         | Cell wall/membrane biogenesis                                | 225              | 3            | 1            | 0            | 229         |
| N                                         | Cell motility                                                | 85               | 0            | 1            | 0            | 86          |
| O                                         | Posttranslational modification, protein turnover, chaperones | 158              | 1            | 0            | 0            | 159         |
| T                                         | Signal transduction mechanisms                               | 304              | 0            | 0            | 0            | 304         |
| U                                         | Intracellular trafficking and secretion                      | 44               | 0            | 0            | 2            | 46          |
| V                                         | Defense mechanisms                                           | 133              | 3            | 1            | 1            | 138         |
| W                                         | Extracellular structures                                     | 9                | 0            | 0            | 0            | 9           |
| Z                                         | Cytoskeleton                                                 | 4                | 0            | 0            | 0            | 4           |
| <b>Information storage and processing</b> |                                                              | <b>932</b>       | <b>12</b>    | <b>2</b>     | <b>4</b>     | <b>950</b>  |
| A                                         | RNA processing and modification                              | 2                | 0            | 0            | 0            | 2           |
| J                                         | Translation, ribosomal structure and biogenesis              | 293              | 2            | 0            | 0            | 295         |
| K                                         | Transcription                                                | 478              | 2            | 1            | 1            | 482         |
| L                                         | Replication, recombination and repair                        | 159              | 8            | 1            | 3            | 171         |
| <b>Metabolism</b>                         |                                                              | <b>1855</b>      | <b>12</b>    | <b>0</b>     | <b>2</b>     | <b>1869</b> |
| C                                         | Energy production and conversion                             | 166              | 0            | 0            | 0            | 166         |
| E                                         | Amino acid transport and metabolism                          | 353              | 1            | 0            | 1            | 355         |
| F                                         | Nucleotide transport and metabolism                          | 106              | 6            | 0            | 0            | 112         |
| G                                         | Carbohydrate transport and metabolism                        | 503              | 1            | 0            | 1            | 505         |
| H                                         | Coenzyme transport and metabolism                            | 222              | 4            | 0            | 0            | 226         |
| I                                         | Lipid transport and metabolism                               | 122              | 0            | 0            | 0            | 122         |
| P                                         | Inorganic ion transport and metabolism                       | 249              | 0            | 0            | 0            | 249         |

|   |                                                              |            |          |          |          |            |
|---|--------------------------------------------------------------|------------|----------|----------|----------|------------|
| Q | Secondary metabolites biosynthesis, transport and catabolism | 87         | 0        | 0        | 0        | 87         |
| X | Mobilome; prophages, transposons                             | 47         | 0        | 0        | 0        | 47         |
|   | Poorly characterized                                         | <b>688</b> | <b>4</b> | <b>1</b> | <b>2</b> | <b>695</b> |
| R | General function prediction only                             | 446        | 3        | 1        | 1        | 451        |
| S | Function unknown                                             | 242        | 1        | 0        | 1        | 244        |
|   | Not in COGs                                                  | 432        | 7        | 0        | 0        | 439        |
