# Supplementary material for: Comparative Genomics Insights into a Novel Biocontrol Agent Paenibacillus peoriae Strain ZF390 against Bacterial Soft Rot
Source: MDPI journal article supplement (doi:10.3390/biology11081172), 2022-08-04
Supplement: s1 [file s1]

**Supplementary Table S5** Strains and housekeeping genes locus tag information used for the phylogenetic tree construction in this study.

| Strain                                                      | <i>gyrB</i>    | <i>rpoD</i>    | <i>rplA</i>    | <i>atpD</i>    | <i>holB</i>    | <i>rho</i>     | <i>dnaA</i>    | <i>rpsA</i>    |
|-------------------------------------------------------------|----------------|----------------|----------------|----------------|----------------|----------------|----------------|----------------|
| <i>Paenibacillus alvei</i> DSM 29 <sup>T</sup>              | PAV_RS09320    | PAV_RS15955    | PAV_RS06775    | PAV_RS07565    | PAV_RS09385    | PAV_RS10040    | PAV_RS09295    | PAV_RS13070    |
| <i>Paenibacillus beijingensis</i> DSM 24997 <sup>T</sup>    | VN24_10220     | VN24_19405     | VN24_12580     | VN24_08235     | VN24_10290     | VN24_10930     | VN24_10195     | VN24_24850     |
| <i>Paenibacillus chitinolyticus</i> NBRC 15660 <sup>T</sup> | PCH01S_RS28520 | PCH01S_RS13365 | PCH01S_RS27990 | PCH01S_RS23965 | PCH01S_RS27620 | PCH01S_RS27275 | PCH01S_RS28495 | PCH01S_RS08855 |
| <i>Paenibacillus ehimensis</i> NBRC 15659 <sup>T</sup>      | PEH01S_RS27300 | PEH01S_RS08230 | PEH01S_RS20985 | PEH01S_RS25465 | PEH01S_RS28245 | PEH01S_RS25540 | PEH01S_RS27325 | PEH01S_RS12040 |
| <i>Paenibacillus elgii</i> NBRC 100335 <sup>T</sup>         | PEL01S_RS23625 | PEL01S_RS19625 | PEL01S_RS25250 | PEL01S_RS30385 | PEL01S_RS30940 | PEL01S_RS29105 | PEL01S_RS23600 | PEL01S_RS09150 |
| <i>Paenibacillus glucanolyticus</i> DSM 5162 <sup>T</sup>   | A3958_09445    | A3958_17425    | A3958_06690    | A3958_07450    | A3958_09520    | A3958_10050    | A3958_09420    | A3958_19510    |
| <i>Paenibacillus graminis</i> DSM 15220 <sup>T</sup>        | PGRAT_00030    | PGRAT_24795    | PGRAT_29410    | PGRAT_30150    | PGRAT_00100    | PGRAT_00610    | PGRAT_00005    | PGRAT_20965    |
| <i>Paenibacillus helianthi</i> P26E <sup>T</sup>            | A3844_RS26635  | A3844_RS04815  | A3844_RS20340  | A3844_RS15485  | A3844_RS20515  | A3844_RS23100  | A3844_RS26610  | A3844_RS12415  |
| <i>Paenibacillus kribbensis</i> AM49 <sup>T</sup>           | B4V02_25205    | B4V02_08530    | B4V02_02815    | B4V02_02015    | B4V02_25135    | B4V02_24555    | B4V02_25230    | B4V02_10395    |
| <i>Paenibacillus macerans</i> NBRC 15307 <sup>T</sup>       | PMA02S_RS30570 | PMA02S_RS26285 | PMA02S_RS16265 | PMA02S_RS30935 | PMA02S_RS19245 | PMA02S_RS24235 | PMA02S_RS30545 | PMA02S_RS23730 |
| <i>Paenibacillus pabuli</i> NBRC 13638 <sup>T</sup>         | PPA03S_RS26305 | PPA03S_RS23730 | PPA03S_RS29985 | PPA03S_RS08350 | PPA03S_RS29675 | PPA03S_RS30515 | PPA03S_RS26330 | PPA03S_RS25735 |
| <i>Paenibacillus peoriae</i> KCTC 3763 <sup>T</sup>         | KQI_RS0110920  | KQI_RS0103695  | KQI_RS0120930  | KQI_RS0125435  | KQI_RS0124435  | KQI_RS0109780  | KQI_RS0110945  | KQI_RS0105555  |
| <i>Paenibacillus peoriae</i> ZF390                          | IAQ67_00030    | IAQ67_19485    | IAQ67_25150    | IAQ67_25910    | IAQ67_00100    | IAQ67_00730    | IAQ67_00005    | IAQ67_17705    |
| <i>Paenibacillus polymyxa</i> DSM 36 <sup>T</sup>           | G7035_08355    | G7035_17095    | G7035_11475    | G7035_10705    | G7035_08285    | G7035_07695    | G7035_08380    | G7035_18885    |
| <i>Paenibacillus riograndensis</i> SBR5 <sup>T</sup>        | PRI0_RS00030   | PRI0_RS25495   | PRI0_RS30270   | PRI0_RS31100   | PRI0_RS00100   | PRI0_RS00600   | PRI0_RS00005   | PRI0_RS22150   |
| <i>Paenibacillus xylanilyticus</i> LMG 21957 <sup>T</sup>   | HP552_RS03245  | HP552_RS21925  | HP552_RS02505  | HP552_RS17300  | HP552_RS05875  | HP552_RS02930  | HP552_RS03220  | HP552_RS23540  |
| <i>Paenibacillus yonginensis</i> DCY84 <sup>T</sup>         | AWM70_RS19015  | AWM70_RS05900  | AWM70_RS16640  | AWM70_RS17380  | AWM70_RS18945  | AWM70_RS18420  | AWM70_RS19040  | AWM70_RS09900  |
