# Supplementary material for: Comparative Genomics Insights into a Novel Biocontrol Agent Paenibacillus peoriae Strain ZF390 against Bacterial Soft Rot
Source: MDPI journal article supplement (doi:10.3390/biology11081172), 2022-08-04
Supplement: s1 [file s1]

**Supplementary Table S2** Genome statistics.

| Attribute                    | Chromosome value | pPlas1 value | pPlas2 value | pPlas3 value |
|------------------------------|------------------|--------------|--------------|--------------|
| GenBank sequence             | CP061172.1       | CP061173.1   | CP061174.1   | CP061175.1   |
| Genome size (bp)             | 6193667          | 137220       | 16869        | 36233        |
| GC content (%)               | 44.96            | 45.58        | 45.12        | 41.66        |
| Predicted genes              | 5662             | 169          | 16           | 43           |
| Protein coding genes         | 5353             | 163          | 16           | 42           |
| Ribosomal RNA                | 40               | -            | -            | -            |
| Transfer RNA                 | 95               | 6            | -            | -            |
| Other RNA                    | 4                | -            | -            | -            |
| Pseudo genes                 | 170              | -            | -            | 1            |
| GIs number                   | 17               | -            | -            | -            |
| Prophage number              | 5                | -            | -            | -            |
| CRISPR number                | 11               | -            | -            | -            |
| Genes assigned to KEGGs      | 5402             |              |              |              |
| Genes assigned to GOs        | 3754             |              |              |              |
| Genes assigned to NR         | 5645             |              |              |              |
| Genes assigned to TCDB       | 481              |              |              |              |
| Genes assigned to Pfam       | 3754             |              |              |              |
| Genes assigned to Swiss-Prot | 2296             |              |              |              |
| Genes assigned to CAZy       | 342              |              |              |              |
