# Supplementary material for: Comparative Genomics Insights into a Novel Biocontrol Agent Paenibacillus peoriae Strain ZF390 against Bacterial Soft Rot
Source: MDPI journal article supplement (doi:10.3390/biology11081172), 2022-08-04
Supplement: s1 [file s1]

**Supplementary Table S8** Comparison of genes involved in synthesis of resistance inducers between strains ZF390, HS311, SQR-21, HY96-2 and PS04.

| Trait           | Gene name   | ZF390       | HS311       | SQR-21   |                | HY96-2   |            | PS04     |               |          |
|-----------------|-------------|-------------|-------------|----------|----------------|----------|------------|----------|---------------|----------|
|                 |             | Locus tag   | Locus tag   | Identity | Locus tag      | Identity | Locus tag  | Identity | Locus tag     | Identity |
|                 |             |             |             | (%)      |                | (%)      |            | (%)      |               | (%)      |
| 2, 3-Butanediol | <i>budA</i> | IAQ67_10485 | ABE82_10900 | 98.66    | PPSQR21_021290 | 91.3     | C1A50_2172 | 91.57    | FOA15_RS16405 | 87.38    |
|                 | <i>ilvN</i> | IAQ67_07060 | ABE82_07220 | 99.79    | PPSQR21_014480 | 92.39    | C1A50_1525 | 92.18    | NA            | NA       |
|                 | <i>alsD</i> | IAQ67_10485 | ABE82_10900 | 98.66    | PPSQR21_021290 | 91.3     | C1A50_2172 | 91.57    | FOA15_RS16405 | 87.38    |
| Methanethiol    | <i>metH</i> | IAQ67_13580 | ABE82_14160 | 98.20    | PPSQR21_027240 | 92.36    | C1A50_2842 | 92.24    | FOA15_RS19725 | 89.57    |
|                 | <i>metE</i> | IAQ67_26535 | ABE82_24030 | 95.73    | PPSQR21_048240 | 88.79    | C1A50_4952 | 88.72    | FOA15_RS04100 | 88.14    |
|                 | <i>mtnE</i> | IAQ67_20625 | NA          | NA       | NA             | NA       | C1A50_3727 | NA       | NA            | NA       |
|                 | <i>mmuM</i> | IAQ67_27500 | ABE82_25055 | 96.1     | PPSQR21_050120 | 87.58    | C1A50_5155 | 87.26    | FOA15_RS05125 | 87.87    |
| Isoprene        | <i>idi</i>  | IAQ67_26035 | ABE82_23520 | 94.82    | PPSQR21_047280 | 86.74    | C1A50_4852 | 87.01    | FOA15_RS03605 | 85.74    |
|                 | <i>lytB</i> | IAQ67_07305 | ABE82_07770 | 98.01    | PPSQR21_015510 | 92.58    | C1A50_1576 | 92.58    | FOA15_RS13505 | 86.51    |
|                 | <i>gcpE</i> | IAQ67_22060 | ABE82_19460 | 95.89    | PPSQR21_039310 | 90.88    | C1A50_4006 | 90.88    | FOA15_RS25145 | 89.18    |
|                 | <i>ispF</i> | IAQ67_25210 | ABE82_22655 | 98.74    | PPSQR21_045590 | 89.92    | C1A50_4678 | 89.71    | FOA15_RS02735 | 91.81    |
|                 | <i>ispE</i> | IAQ67_00170 | ABE82_00175 | 96.84    | PPSQR21_000340 | 91.70    | C1A50_0038 | 91.70    | NA            | NA       |

NA = not available
