# Supplementary material for: Comparative Genomics Insights into a Novel Biocontrol Agent Paenibacillus peoriae Strain ZF390 against Bacterial Soft Rot
Source: MDPI journal article supplement (doi:10.3390/biology11081172), 2022-08-04
Supplement: s1 [file s1]

**Supplementary Table S7** Comparison of genes involved in biofilm formation between strains ZF390, HS311, SQR-21, HY96-2 and PS04.

| Trait              | Gene name   | ZF390       | HS311       | SQR-21   |                | HY96-2   |            | PS04     |               |          |
|--------------------|-------------|-------------|-------------|----------|----------------|----------|------------|----------|---------------|----------|
|                    |             | Locus tag   | Locus tag   | Identity | Locus tag      | Identity | Locus tag  | Identity | Locus tag     | Identity |
|                    |             |             |             | (%)      |                | (%)      |            | (%)      |               | (%)      |
| Flagellar assembly | <i>fliE</i> | IAQ67_09675 | ABE82_10125 | 99.68    | PPSQR21_019620 | 97.78    | C1A50_2009 | 98.10    | FOA15_RS15630 | 95.56    |
|                    | <i>fliF</i> | IAQ67_09680 | ABE82_10130 | 98.48    | PPSQR21_019630 | 94.13    | C1A50_2010 | 94.32    | FOA15_RS15635 | 91.35    |
|                    | <i>fliG</i> | IAQ67_09685 | ABE82_10135 | 98.53    | PPSQR21_019640 | 93.51    | C1A50_2011 | 93.51    | FOA15_RS15640 | 92.53    |
|                    | <i>fliH</i> | IAQ67_09690 | ABE82_10140 | 98.81    | PPSQR21_019650 | 92.59    | C1A50_2012 | 92.47    | FOA15_RS15645 | 90.44    |
|                    | <i>fliI</i> | IAQ67_09695 | ABE82_10145 | 98.64    | PPSQR21_019660 | 91.44    | C1A50_2013 | 91.06    | FOA15_RS15650 | 89.09    |
|                    | <i>fliJ</i> | IAQ67_09700 | ABE82_10150 | 99.55    | PPSQR21_019670 | 96.17    | C1A50_2014 | 96.17    | FOA15_RS15655 | 97.07    |
|                    | <i>fliK</i> | IAQ67_09710 | ABE82_10160 | 97.05    | PPSQR21_019690 | 89.51    | C1A50_2016 | 89.71    | FOA15_RS15665 | 86.79    |
|                    | <i>fliL</i> | IAQ67_09735 | ABE82_10185 | 99.37    | PPSQR21_019740 | 97.68    | C1A50_2021 | 97.47    | FOA15_RS15690 | 93.88    |
|                    | <i>fliM</i> | IAQ67_09740 | ABE82_10190 | 99.30    | PPSQR21_019750 | 96.20    | C1A50_2022 | 96.10    | FOA15_RS15695 | 93.89    |
|                    | <i>fliN</i> | IAQ67_09745 | ABE82_10195 | 98.25    | PPSQR21_019760 | 94.67    | C1A50_2023 | 93.76    | FOA15_RS15700 | 89.47    |
|                    | <i>fliO</i> | IAQ67_09755 | ABE82_10205 | 99.25    | PPSQR21_019780 | 96.65    | C1A50_2025 | 96.83    | FOA15_RS15710 | 95.32    |
|                    | <i>fliP</i> | IAQ67_09760 | ABE82_10210 | 98.68    | PPSQR21_019790 | 95.24    | C1A50_2026 | 95.50    | FOA15_RS15715 | 94.44    |
|                    | <i>fliQ</i> | IAQ67_09765 | ABE82_10215 | 98.89    | PPSQR21_019800 | 96.30    | C1A50_2027 | 96.30    | FOA15_RS15720 | 95.93    |
|                    | <i>fliR</i> | IAQ67_09770 | ABE82_10220 | 98.35    | PPSQR21_019810 | 92.49    | C1A50_2028 | 93.13    | FOA15_RS15725 | 90.08    |
|                    | <i>fliH</i> | IAQ67_09780 | ABE82_10230 | 97.89    | PPSQR21_019830 | 92.58    | C1A50_2030 | 92.63    | FOA15_RS15735 | 90.07    |
|                    | <i>fliB</i> | IAQ67_09775 | ABE82_10225 | 98.83    | PPSQR21_019820 | 93.71    | C1A50_2029 | 94.70    | FOA15_RS15730 | 94.43    |
|                    | <i>flgB</i> | IAQ67_09665 | ABE82_10115 | 99.26    | PPSQR21_019600 | 96.81    | C1A50_2007 | 96.81    | FOA15_RS15620 | 93.14    |
|                    | <i>flgC</i> | IAQ67_09670 | ABE82_10120 | 99.56    | PPSQR21_019610 | 97.13    | C1A50_2008 | 97.13    | FOA15_RS15625 | 94.04    |

|             |             |             |       |                |       |            |       |               |       |
|-------------|-------------|-------------|-------|----------------|-------|------------|-------|---------------|-------|
| <i>flgD</i> | IAQ67_09715 | ABE82_10165 | 97.57 | PPSQR21_019700 | 92.88 | C1A50_2017 | 92.88 | FOA15_RS15670 | 89.33 |
| <i>flgE</i> | IAQ67_09725 | ABE82_10175 | 87.96 | PPSQR21_019720 | 85.26 | C1A50_2019 | 88.24 | FOA15_RS15680 | 85.08 |
| <i>flgF</i> | IAQ67_25870 | ABE82_23355 | 98.31 | PPSQR21_046940 | 91.41 | C1A50_4815 | 91.41 | FOA15_RS03425 | 90.85 |
| <i>flgG</i> | IAQ67_25865 | ABE82_23350 | 98.55 | PPSQR21_046930 | 92.27 | C1A50_4814 | 91.67 | FOA15_RS03420 | 88.15 |
| <i>flgK</i> | NA          | ABE82_23205 | NA    | NA             | NA    | C1A50_4782 | NA    | FOA15_RS03275 | NA    |
| <i>flgK</i> | IAQ67_25720 | NA          | NA    | PPSQR21_046630 | 91.71 | NA         | NA    | NA            | NA    |
| <i>flgL</i> | NA          | ABE82_23200 | NA    | NA             | NA    | NA         | NA    | FOA15_RS03270 | NA    |
| <i>flgL</i> | IAQ67_25715 | NA          | NA    | PPSQR21_046620 | 92.83 | NA         | NA    | NA            | NA    |
| <i>fliC</i> | NA          | ABE82_23185 | NA    | NA             | NA    | C1A50_4778 | NA    | FOA15_RS03255 | NA    |
| <i>fliC</i> | IAQ67_25695 | NA          | NA    | PPSQR21_046580 | 80.84 | NA         | NA    | NA            | NA    |
| <i>fliD</i> | NA          | ABE82_23175 | NA    | NA             | NA    | NA         | NA    | FOA15_RS03245 | NA    |
| <i>fliD</i> | NA          | NA          | NA    | PPSQR21_046460 | NA    | NA         | NA    | NA            | NA    |
| <i>fliS</i> | NA          | ABE82_23170 | NA    | NA             | NA    | NA         | NA    | FOA15_RS03240 | NA    |
| <i>fliS</i> | NA          | NA          | NA    | PPSQR21_046450 | NA    | NA         | NA    | NA            | NA    |
| <i>motA</i> | IAQ67_00530 | ABE82_00515 | 97.86 | PPSQR21_001030 | 88.55 | C1A50_0111 | 88.55 | FOA15_RS06375 | 85.79 |
| <i>motA</i> | IAQ67_25445 | ABE82_22900 | 98.31 | PPSQR21_046080 | 91.79 | C1A50_4728 | 91.67 | FOA15_RS02955 | 88.33 |
| <i>motB</i> | IAQ67_00525 | ABE82_00510 | 97.46 | PPSQR21_001020 | 91.56 | C1A50_0110 | 91.68 | FOA15_RS06370 | 89.25 |
| <i>motB</i> | IAQ67_25450 | ABE82_22905 | 97.18 | PPSQR21_046090 | 88.98 | C1A50_4729 | 88.97 | NA            | NA    |
| <i>flgM</i> | IAQ67_25730 | ABE82_23215 | 95.65 | PPSQR21_046650 | 95.29 | C1A50_4784 | 94.93 | FOA15_RS03285 | 90.58 |
| <i>fliY</i> | IAQ67_03860 | ABE82_04000 | 97.90 | PPSQR21_008370 | 90.09 | C1A50_0876 | 89.98 | FOA15_RS09820 | 88.24 |
| <i>fliY</i> | IAQ67_21165 | ABE82_18585 | 96.95 | PPSQR21_037380 | 89.67 | C1A50_3827 | 89.44 | FOA15_RS24065 | 90.85 |
| <i>rpoD</i> | IAQ67_19485 | ABE82_16910 | 98.24 | PPSQR21_033900 | 97.44 | C1A50_3447 | 97.27 | FOA15_RS22510 | 95.24 |
| <i>rpoN</i> | IAQ67_07520 | ABE82_12750 | 97.61 | NA             | NA    | NA         | NA    | NA            | NA    |

|                                    |              |             |             |       |                |       |            |       |               |       |
|------------------------------------|--------------|-------------|-------------|-------|----------------|-------|------------|-------|---------------|-------|
| Nonribosomal<br>peptide structures | <i>fliA</i>  | IAQ67_09825 | ABE82_10275 | 98.86 | PPSQR21_019920 | 93.54 | C1A50_2039 | 93.66 | FOA15_RS15780 | 92.78 |
|                                    | <i>srfAC</i> | NA          | NA          | NA    | PPSQR21_013120 | NA    | C1A50_1383 | NA    | NA            | NA    |
|                                    | <i>ituA</i>  | NA          | ABE82_05825 | NA    | PPSQR21_011670 | NA    | C1A50_1227 | NA    | NA            | NA    |
|                                    | <i>ituA</i>  | NA          | NA          | NA    | PPSQR21_009720 | NA    | C1A50_1015 | NA    | NA            | NA    |
|                                    | <i>fenC</i>  | IAQ67_12025 | ABE82_12415 | 97.43 | NA             | NA    | NA         | NA    | NA            | NA    |
|                                    | <i>fenB</i>  | IAQ67_24735 | ABE82_22155 | 97.64 | PPSQR21_044650 | 97.37 | C1A50_4577 | 97.79 | FOA15_RS17225 | 77.53 |
|                                    | <i>fenA</i>  | NA          | ABE82_05815 | NA    | PPSQR21_011650 | NA    | C1A50_1225 | NA    | NA            | NA    |
|                                    | <i>fenA</i>  | IAQ67_12540 | ABE82_12955 | 99.92 | PPSQR21_024990 | 99.82 | C1A50_2567 | 99.81 | NA            | NA    |
|                                    | <i>fenA</i>  | IAQ67_12545 | ABE82_12950 | 99.93 | PPSQR21_025010 | 99.79 | C1A50_2568 | 99.84 | NA            | NA    |
|                                    | <i>mcp</i>   | IAQ67_02300 | ABE82_02430 | 96.40 | PPSQR21_005050 | 88.23 | C1A50_0512 | 88.11 | NA            | NA    |
|                                    | <i>mcp</i>   | IAQ67_05160 | ABE82_05315 | 97.96 | PPSQR21_010680 | 92.69 | C1A50_1117 | 92.61 | FOA15_RS11145 | 90.09 |
|                                    | <i>mcp</i>   | IAQ67_06225 | ABE82_06370 | 92.52 | PPSQR21_012710 | 89.46 | C1A50_1339 | 89.21 | FOA15_RS12100 | 89.52 |
|                                    | <i>mcp</i>   | IAQ67_06655 | ABE82_06795 | 97.82 | PPSQR21_013630 | 89.79 | C1A50_1435 | 89.79 | FOA15_RS12625 | 87.42 |
|                                    | <i>mcp</i>   | IAQ67_08250 | ABE82_08570 | 96.70 | NA             | NA    | C1A50_1734 | 90.80 | NA            | NA    |
|                                    | <i>mcp</i>   | IAQ67_09205 | ABE82_09550 | 96.42 | PPSQR21_018710 | 94.31 | C1A50_1916 | 94.31 | NA            | NA    |
|                                    | <i>mcp</i>   | IAQ67_09235 | ABE82_09580 | 96.97 | PPSQR21_018770 | 89.94 | C1A50_1923 | 90.11 | FOA15_RS15200 | 85.34 |
|                                    | <i>mcp</i>   | IAQ67_09280 | ABE82_09625 | 97.68 | PPSQR21_018860 | 91.64 | C1A50_1933 | 91.53 | FOA15_RS15245 | 85.31 |
|                                    | <i>mcp</i>   | IAQ67_11720 | ABE82_12040 | 96.75 | PPSQR21_023520 | 89.32 | C1A50_2424 | 88.87 | FOA15_RS17660 | 85.04 |
|                                    | <i>mcp</i>   | IAQ67_18010 | ABE82_15430 | 97.24 | PPSQR21_029860 | 87.71 | C1A50_3126 | 87.66 | FOA15_RS21025 | 85.30 |
|                                    | <i>mcp</i>   | IAQ67_18775 | ABE82_16185 | 96.32 | PPSQR21_031570 | 90.88 | C1A50_3304 | 90.93 | FOA15_RS21820 | 84.03 |
| Bacterial<br>chemotaxis            | <i>mcp</i>   | IAQ67_20305 | ABE82_17735 | 97.38 | PPSQR21_035680 | 92.20 | C1A50_3645 | 92.11 | FOA15_RS23335 | 92.54 |
|                                    | <i>mcp</i>   | IAQ67_20340 | ABE82_17780 | 97.59 | PPSQR21_035780 | 91.98 | C1A50_3658 | 91.70 | FOA15_RS23370 | 86.61 |
|                                    | <i>mcp</i>   | IAQ67_21370 | ABE82_18780 | 91.78 | PPSQR21_037690 | 89.45 | C1A50_3863 | 89.58 | NA            | NA    |
|                                    | <i>mcp</i>   | IAQ67_21370 | ABE82_18780 | 91.78 | PPSQR21_037690 | 89.45 | C1A50_3863 | 89.58 | NA            | NA    |

|             |             |             |       |                |       |            |       |               |       |
|-------------|-------------|-------------|-------|----------------|-------|------------|-------|---------------|-------|
| <i>mcp</i>  | IAQ67_21545 | ABE82_18950 | 96.93 | PPSQR21_038040 | 91.56 | C1A50_3898 | 91.69 | FOA15_RS24455 | 88.31 |
| <i>mcp</i>  | IAQ67_21595 | ABE82_19000 | 94.63 | PPSQR21_038140 | 91.49 | C1A50_3908 | 91.08 | FOA15_RS24505 | 86.43 |
| <i>mcp</i>  | IAQ67_22455 | ABE82_19850 | 94.34 | PPSQR21_040050 | 89.86 | C1A50_4078 | 89.91 | FOA15_RS00090 | 85.58 |
| <i>mcp</i>  | IAQ67_26450 | ABE82_23950 | 93.87 | PPSQR21_048070 | 89.94 | C1A50_4935 | 89.99 | FOA15_RS04040 | 83.98 |
| <i>mcp</i>  | NA          | ABE82_24725 | NA    | NA             | NA    | NA         | NA    | NA            | NA    |
| <i>mcp</i>  | IAQ67_08120 | ABE82_08475 | 96.71 | PPSQR21_016810 | 90.04 | C1A50_1715 | 90.04 | FOA15_RS14060 | 86.55 |
| <i>mcp</i>  | NA          | NA          | NA    | PPSQR21_036040 | NA    | C1A50_3685 | NA    | NA            | NA    |
| <i>mcp</i>  | NA          | NA          | NA    | PPSQR21_038590 | NA    | C1A50_3934 | NA    | NA            | NA    |
| <i>mcp</i>  | NA          | NA          | NA    | PPSQR21_051220 | NA    | NA         | NA    | NA            | NA    |
| <i>cheD</i> | IAQ67_09815 | ABE82_10265 | 97.19 | PPSQR21_019900 | 91.16 | C1A50_2037 | 91.16 | FOA15_RS15770 | 91.57 |
| <i>cheR</i> | IAQ67_17590 | ABE82_15020 | 97.85 | PPSQR21_029030 | 94.94 | C1A50_3042 | 95.32 | FOA15_RS20610 | 90.77 |
| <i>cheR</i> | IAQ67_23780 | ABE82_21195 | 96.90 | PPSQR21_042930 | 93.22 | C1A50_4394 | 93.79 | NA            | NA    |
| <i>cheB</i> | IAQ67_09795 | ABE82_10245 | 97.99 | PPSQR21_019860 | 89.39 | C1A50_2033 | 89.33 | FOA15_RS15750 | 84.12 |
| <i>cheA</i> | IAQ67_09800 | ABE82_10250 | 97.66 | PPSQR21_019870 | 92.70 | C1A50_2034 | 92.61 | FOA15_RS15755 | 90.27 |
| <i>cheW</i> | IAQ67_09805 | ABE82_10255 | 99.57 | PPSQR21_019880 | 93.07 | C1A50_2035 | 93.07 | FOA15_RS15760 | 93.29 |
| <i>cheW</i> | IAQ67_24355 | ABE82_21770 | 96.14 | PPSQR21_044060 | 91.06 | C1A50_4518 | 91.06 | FOA15_RS01970 | 86.96 |
| <i>cheC</i> | IAQ67_09810 | ABE82_10260 | 99.36 | PPSQR21_019890 | 93.46 | C1A50_2036 | 93.30 | FOA15_RS15765 | 89.79 |
| <i>cheX</i> | IAQ67_22920 | ABE82_20305 | 99.13 | PPSQR21_040970 | 96.95 | C1A50_4176 | 96.73 | FOA15_RS00500 | 93.90 |
| <i>cheY</i> | IAQ67_09750 | ABE82_10200 | 99.73 | PPSQR21_019770 | 97.81 | C1A50_2024 | 97.81 | FOA15_RS15705 | 97.50 |
| <i>cheY</i> | IAQ67_10960 | ABE82_11350 | 98.07 | PPSQR21_022280 | 92.11 | C1A50_2296 | 92.11 | FOA15_RS16905 | 90.08 |
| <i>fliG</i> | IAQ67_09685 | ABE82_10135 | 98.53 | PPSQR21_019640 | 93.51 | C1A50_2011 | 93.51 | FOA15_RS15640 | 92.53 |
| <i>fliM</i> | IAQ67_09740 | ABE82_10190 | 99.30 | PPSQR21_019750 | 96.20 | C1A50_2022 | 96.10 | FOA15_RS15695 | 93.89 |
| <i>fliN</i> | IAQ67_09745 | ABE82_10195 | 98.25 | PPSQR21_019760 | 94.67 | C1A50_2023 | 93.76 | FOA15_RS15700 | 89.47 |

|                |             |             |             |        |                |       |            |       |               |       |
|----------------|-------------|-------------|-------------|--------|----------------|-------|------------|-------|---------------|-------|
| Quorum sensing | <i>motA</i> | IAQ67_00530 | ABE82_00515 | 97.86  | PPSQR21_001030 | 88.55 | C1A50_0111 | 88.55 | FOA15_RS06375 | 85.79 |
|                | <i>motA</i> | IAQ67_25445 | ABE82_22900 | 98.31  | PPSQR21_046080 | 91.79 | C1A50_4728 | 91.67 | FOA15_RS02955 | 88.33 |
|                | <i>motB</i> | IAQ67_00525 | ABE82_00510 | 97.46  | PPSQR21_001020 | 91.56 | C1A50_0110 | 91.68 | FOA15_RS06370 | 89.25 |
|                | <i>motB</i> | IAQ67_25450 | ABE82_22905 | 97.18  | PPSQR21_046090 | 88.98 | C1A50_4729 | 88.97 | NA            | NA    |
|                | <i>rbsB</i> | IAQ67_05040 | ABE82_05215 | 98.9   | PPSQR21_010490 | 90.59 | C1A50_1098 | 90.69 | FOA15_RS11045 | 91.59 |
|                | <i>rbsB</i> | IAQ67_05325 | ABE82_05490 | 96.73  | PPSQR21_010960 | 89.38 | C1A50_1147 | 89.29 | FOA15_RS11265 | 88.57 |
|                | <i>rbsB</i> | IAQ67_13175 | ABE82_13755 | 97.29  | PPSQR21_026420 | 90.33 | C1A50_2758 | 90.76 | FOA15_RS19340 | 86.21 |
|                | <i>luxS</i> | IAQ67_02605 | ABE82_02735 | 97.62  | PPSQR21_005820 | 92.42 | C1A50_0600 | 92.42 | FOA15_RS08615 | 91.13 |
|                | <i>aphA</i> | IAQ67_02980 | ABE82_03245 | 97.27  | PPSQR21_006690 | 90.35 | C1A50_0698 | 90.71 | FOA15_RS09040 | 87.91 |
|                | <i>aphA</i> | IAQ67_17015 | ABE82_14410 | 96.85  | PPSQR21_027930 | 92.50 | C1A50_2922 | 92.50 | FOA15_RS19965 | 89.37 |
|                | <i>hfq</i>  | IAQ67_16940 | ABE82_14335 | 100.00 | PPSQR21_027780 | 94.31 | C1A50_2906 | 93.50 | FOA15_RS19890 | 91.06 |
|                | <i>trpE</i> | IAQ67_17570 | ABE82_15000 | 97.94  | PPSQR21_028990 | 93.36 | C1A50_3038 | 93.29 | FOA15_RS20590 | 90.84 |
|                | <i>kdpE</i> | NA          | ABE82_13170 | NA     | NA             | NA    | NA         | NA    | NA            | NA    |
|                | <i>blcC</i> | IAQ67_13135 | ABE82_13725 | 98.68  | PPSQR21_026340 | 92.77 | C1A50_2750 | 93.52 | NA            | NA    |
|                | <i>blcC</i> | NA          | ABE82_14430 | NA     | NA             | NA    | NA         | NA    | NA            | NA    |
|                | <i>blcC</i> | IAQ67_13135 | ABE82_13725 | 98.68  | PPSQR21_026350 | 92.77 | C1A50_2750 | 93.52 | NA            | NA    |
|                | <i>blcC</i> | IAQ67_20745 | NA          | NA     | PPSQR21_034830 | 99.08 | C1A50_3551 | 99.08 | NA            | NA    |
|                | <i>pel</i>  | IAQ67_01205 | ABE82_01255 | 95.37  | PPSQR21_002420 | 89.73 | C1A50_0247 | 89.83 | FOA15_RS07185 | 84.59 |
|                | <i>pel</i>  | IAQ67_21045 | ABE82_18485 | 96.11  | PPSQR21_037180 | 87.94 | C1A50_3806 | 87.70 | FOA15_RS23945 | 89.60 |
|                | <i>fadD</i> | IAQ67_00385 | ABE82_00395 | 96.51  | PPSQR21_000780 | 92.12 | C1A50_0084 | 92.26 | FOA15_RS06250 | 90.05 |
|                | <i>crp</i>  | IAQ67_27590 | ABE82_25150 | 97.21  | PPSQR21_050290 | 92.74 | C1A50_5172 | 93.11 | FOA15_RS05195 | 87.52 |
|                | <i>xagB</i> | IAQ67_25550 | ABE82_23005 | 96.75  | PPSQR21_046280 | 91.75 | C1A50_4749 | 91.79 | FOA15_RS03080 | 87.91 |
|                | <i>gmuG</i> | IAQ67_02865 | ABE82_03090 | 95.90  | PPSQR21_006420 | 90.29 | C1A50_0666 | 90.64 | NA            | NA    |

|             |             |             |       |                |       |            |       |               |       |
|-------------|-------------|-------------|-------|----------------|-------|------------|-------|---------------|-------|
| <i>gmuG</i> | IAQ67_05775 | ABE82_05975 | 95.63 | PPSQR21_011970 | 91.76 | C1A50_1258 | 91.70 | FOA15_RS11710 | 89.62 |
| <i>gmuG</i> | NA          | ABE82_12475 | NA    | NA             | NA    | NA         | NA    | NA            | NA    |
| <i>gmuG</i> | IAQ67_19010 | ABE82_16445 | 97.48 | PPSQR21_032950 | 91.38 | C1A50_3348 | 91.38 | FOA15_RS22025 | 85.95 |
| <i>gmuG</i> | NA          | ABE82_20505 | NA    | PPSQR21_025410 | NA    | C1A50_2657 | NA    | NA            | NA    |
| <i>gmuG</i> | IAQ67_25475 | ABE82_22930 | 96.13 | PPSQR21_046130 | 90.71 | C1A50_4734 | 90.61 | FOA15_RS03010 | 92.10 |
| <i>gmuG</i> | NA          | NA          | NA    | PPSQR21_005920 | NA    | C1A50_0610 | NA    | NA            | NA    |
| <i>gmuG</i> | IAQ67_02220 | NA          | NA    | PPSQR21_006970 | 92.73 | C1A50_0728 | 92.42 | NA            | NA    |
| <i>gmuG</i> | NA          | NA          | NA    | PPSQR21_036480 | NA    | NA         | NA    | NA            | NA    |
| <i>ycdZ</i> | IAQ67_12155 | ABE82_12615 | 99.77 | NA             | NA    | NA         | NA    | NA            | NA    |
| <i>ycdZ</i> | IAQ67_26040 | ABE82_23525 | 97.76 | PPSQR21_047290 | 90.12 | C1A50_4853 | 88.68 | FOA15_RS03610 | 85.98 |
| <i>ycdZ</i> | IAQ67_26050 | ABE82_23535 | 97.42 | PPSQR21_047310 | 91.28 | C1A50_4855 | 91.31 | FOA15_RS03620 | 86.62 |
| <i>ribA</i> | IAQ67_24380 | ABE82_21790 | 97.78 | PPSQR21_044110 | 92.46 | C1A50_4524 | 92.72 | FOA15_RS01990 | 89.41 |
| <i>ribD</i> | IAQ67_24375 | ABE82_21785 | 96.73 | PPSQR21_044100 | 92.01 | C1A50_4523 | 92.37 | FOA15_RS01985 | 89.22 |
| <i>ycdT</i> | IAQ67_26595 | ABE82_24085 | 98.68 | PPSQR21_048360 | 93.48 | C1A50_4964 | 93.67 | FOA15_RS04140 | 90.27 |
| <i>ycdV</i> | IAQ67_26600 | ABE82_24090 | 98.99 | PPSQR21_048370 | 95.44 | C1A50_4965 | 95.06 | FOA15_RS04145 | 92.52 |
| <i>ycdU</i> | IAQ67_26605 | ABE82_24095 | 97.81 | PPSQR21_048380 | 92.58 | C1A50_4966 | 93.43 | FOA15_RS04150 | 91.73 |
| <i>ycdS</i> | IAQ67_26615 | ABE82_24105 | 96.65 | PPSQR21_048400 | 91.25 | C1A50_4969 | 90.78 | FOA15_RS04160 | 90.69 |
| <i>ycdU</i> | IAQ67_28125 | ABE82_25745 | 97.75 | NA             | NA    | NA         | NA    | FOA15_RS05625 | 91.58 |
| <i>ycdS</i> | IAQ67_28130 | ABE82_25750 | 97.01 | NA             | NA    | NA         | NA    | FOA15_RS05630 | 84.02 |
| <i>ycdT</i> | IAQ67_28135 | ABE82_25755 | 98.45 | NA             | NA    | NA         | NA    | FOA15_RS05635 | 86.24 |
| <i>ycdV</i> | IAQ67_28140 | ABE82_25760 | 98.06 | NA             | NA    | NA         | NA    | FOA15_RS05640 | 92.85 |
| <i>agrB</i> | NA          | ABE82_07565 | NA    | NA             | NA    | NA         | NA    | NA            | NA    |
| <i>agrB</i> | IAQ67_09445 | ABE82_09790 | 97.09 | PPSQR21_019140 | 91.28 | C1A50_1961 | 91.28 | NA            | NA    |

|              |             |             |       |                |       |            |       |               |       |
|--------------|-------------|-------------|-------|----------------|-------|------------|-------|---------------|-------|
| <i>agrB</i>  | IAQ67_13275 | ABE82_13860 | 93.98 | PPSQR21_026620 | 85.82 | C1A50_2775 | 85.79 | NA            | NA    |
| <i>oppA</i>  | IAQ67_04645 | ABE82_04785 | 97.57 | PPSQR21_009960 | 91.61 | C1A50_1038 | 91.61 | FOA15_RS10630 | 91.06 |
| <i>oppF</i>  | IAQ67_19345 | ABE82_16775 | 98.72 | PPSQR21_033630 | 92.97 | C1A50_3418 | 92.76 | FOA15_RS22370 | 90.84 |
| <i>oppC</i>  | IAQ67_19350 | ABE82_16780 | 98.42 | PPSQR21_033640 | 95.58 | C1A50_3419 | 95.79 | FOA15_RS22375 | 86.67 |
| <i>oppB</i>  | IAQ67_19355 | ABE82_16785 | 98.39 | PPSQR21_033650 | 95.61 | C1A50_3420 | 95.61 | FOA15_RS22380 | 87.78 |
| <i>oppA</i>  | IAQ67_19360 | ABE82_16790 | 98.00 | PPSQR21_033660 | 93.24 | C1A50_3421 | 93.18 | FOA15_RS22385 | 91.90 |
| <i>oppD</i>  | IAQ67_21050 | ABE82_18490 | 98.69 | PPSQR21_037190 | 95.32 | C1A50_3807 | 95.69 | FOA15_RS23950 | 92.03 |
| <i>ddpD</i>  | IAQ67_01880 | ABE82_02025 | 97.09 | PPSQR21_003960 | 91.47 | C1A50_0403 | 91.28 | NA            | NA    |
| <i>ddpD</i>  | IAQ67_10760 | ABE82_11145 | 97.87 | PPSQR21_021830 | 91.36 | C1A50_2229 | 91.46 | FOA15_RS16630 | 89.33 |
| <i>ddpD</i>  | IAQ67_12885 | ABE82_13400 | 97.01 | PPSQR21_025870 | 83.87 | C1A50_2701 | 83.63 | FOA15_RS19055 | 81.99 |
| <i>ddpD</i>  | IAQ67_13235 | ABE82_13820 | 95.08 | NA             | NA    | NA         | NA    | NA            | NA    |
| <i>ddpD</i>  | NA          | ABE82_14700 | NA    | NA             | NA    | NA         | NA    | NA            | NA    |
| <i>ddpD</i>  | IAQ67_20395 | ABE82_17885 | 96.26 | NA             | NA    | NA         | NA    | FOA15_RS23480 | 91.41 |
| <i>ddpD</i>  | IAQ67_27435 | ABE82_24990 | 96.94 | PPSQR21_050010 | 84.93 | C1A50_5141 | 84.36 | FOA15_RS05070 | 83.19 |
| <i>ddpD</i>  | IAQ67_28195 | ABE82_25815 | 96.85 | PPSQR21_051510 | 92.89 | C1A50_5306 | 92.89 | FOA15_RS05745 | 91.06 |
| <i>ddpF</i>  | IAQ67_01885 | ABE82_02030 | 96.76 | PPSQR21_003970 | 89.22 | C1A50_0404 | 89.66 | NA            | -     |
| <i>ddpF</i>  | IAQ67_10765 | ABE82_11150 | 98.25 | PPSQR21_021840 | 91.33 | C1A50_2230 | 91.43 | FOA15_RS16635 | 88.21 |
| <i>ddpF</i>  | IAQ67_28190 | ABE82_25810 | 97.41 | PPSQR21_051500 | 90.04 | C1A50_5305 | 90.15 | FOA15_RS05740 | 87.53 |
| <i>yidC</i>  | IAQ67_11330 | ABE82_11640 | 98.80 | PPSQR21_022780 | 91.85 | C1A50_2349 | 91.73 | FOA15_RS17300 | 89.45 |
| <i>yidC</i>  | IAQ67_28300 | ABE82_25930 | 99.31 | PPSQR21_051720 | 92.3  | C1A50_5327 | 92.41 | FOA15_RS05855 | 91.61 |
| <i>srfAC</i> | NA          | NA          | NA    | PPSQR21_013120 | NA    | C1A50_1383 | NA    | NA            | NA    |
| <i>secG</i>  | IAQ67_01010 | ABE82_00985 | 98.29 | PPSQR21_001930 | 95.73 | C1A50_0201 | 95.30 | FOA15_RS06820 | 94.02 |
| <i>ftsY</i>  | IAQ67_09535 | ABE82_09875 | 99.21 | PPSQR21_019320 | 91.53 | C1A50_1978 | 91.63 | FOA15_RS15490 | 89.23 |

|              |             |             |       |                |       |            |       |               |       |
|--------------|-------------|-------------|-------|----------------|-------|------------|-------|---------------|-------|
| <i>ffh</i>   | IAQ67_09550 | ABE82_09890 | 98.69 | PPSQR21_019350 | 93.97 | C1A50_1981 | 93.90 | FOA15_RS15505 | 91.43 |
| <i>yidC</i>  | IAQ67_11330 | ABE82_11640 | 98.80 | PPSQR21_022780 | 91.85 | C1A50_2349 | 91.73 | FOA15_RS17300 | 89.45 |
| <i>yajC</i>  | IAQ67_21750 | ABE82_19150 | 98.21 | PPSQR21_038690 | 94.63 | C1A50_3944 | 94.63 | FOA15_RS24835 | 92.81 |
| <i>secY</i>  | IAQ67_24990 | ABE82_22445 | 99.08 | PPSQR21_045160 | 96.54 | C1A50_4632 | 96.54 | FOA15_RS02515 | 94.07 |
| <i>secE</i>  | IAQ67_25165 | ABE82_22615 | 99.48 | PPSQR21_045510 | 98.44 | C1A50_4670 | 98.44 | FOA15_RS02690 | 97.40 |
| <i>secA</i>  | IAQ67_25610 | ABE82_23065 | 97.84 | PPSQR21_046400 | 92.57 | C1A50_4762 | 92.62 | FOA15_RS03140 | 91.88 |
| <i>yidC</i>  | IAQ67_28300 | ABE82_25930 | 99.31 | PPSQR21_051720 | 92.30 | C1A50_5327 | 92.41 | FOA15_RS05855 | 91.61 |
| <i>degU</i>  | IAQ67_25760 | ABE82_23245 | 97.93 | PPSQR21_046720 | 92.95 | C1A50_4790 | 93.08 | FOA15_RS03315 | 92.67 |
| <i>spo0F</i> | IAQ67_00715 | ABE82_00700 | 99.73 | PPSQR21_001350 | 95.66 | C1A50_0143 | 95.66 | FOA15_RS06530 | 92.68 |
| <i>spo0B</i> | IAQ67_21895 | ABE82_19295 | 98.51 | PPSQR21_038980 | 93.22 | C1A50_3973 | 92.95 | FOA15_RS24980 | 91.06 |
| <i>spo0A</i> | IAQ67_18025 | ABE82_15440 | 97.64 | PPSQR21_029880 | 93.28 | C1A50_3129 | 93.53 | FOA15_RS21040 | 93.53 |
| <i>nisB</i>  | NA          | ABE82_08710 | NA    | NA             | NA    | NA         | NA    | NA            | NA    |
| <i>nisB</i>  | IAQ67_07495 | NA          | NA    | PPSQR21_015860 | 84.15 | C1A50_1611 | 84.28 | NA            | NA    |
| <i>nisB</i>  | NA          | NA          | NA    | PPSQR21_045960 | NA    | C1A50_4716 | NA    | NA            | NA    |
| <i>nisB</i>  | NA          | NA          | NA    | PPSQR21_048920 | NA    | NA         | NA    | NA            | NA    |
| <i>nisC</i>  | NA          | ABE82_08720 | NA    | NA             | NA    | NA         | NA    | NA            | NA    |
| <i>nisC</i>  | IAQ67_07475 | NA          | NA    | PPSQR21_015820 | 83.11 | C1A50_1608 | 83.11 | NA            | NA    |
| <i>nisC</i>  | IAQ67_07485 | NA          | NA    | PPSQR21_015840 | 83.70 | C1A50_1609 | 83.70 | NA            | NA    |
| <i>nisC</i>  | NA          | NA          | NA    | PPSQR21_045950 | NA    | C1A50_4715 | NA    | NA            | NA    |
| <i>nisC</i>  | NA          | NA          | NA    | PPSQR21_048900 | NA    | C1A50_5022 | NA    | NA            | NA    |
| <i>nisT</i>  | NA          | ABE82_08715 | NA    | NA             | NA    | NA         | NA    | NA            | NA    |
| <i>nisT</i>  | IAQ67_07500 | NA          | NA    | PPSQR21_015870 | 89.86 | C1A50_1612 | 90.12 | NA            | NA    |
| <i>nisT</i>  | NA          | NA          | NA    | PPSQR21_048910 | NA    | C1A50_5023 | NA    | NA            | NA    |



|             |             |    |    |                |       |            |       |               |       |
|-------------|-------------|----|----|----------------|-------|------------|-------|---------------|-------|
| <i>nisK</i> | IAQ67_12835 | NA | NA | PPSQR21_025740 | 90.64 | C1A50_2687 | 90.35 | NA            | NA    |
| <i>nisR</i> | IAQ67_12830 | NA | NA | PPSQR21_025730 | 92.41 | C1A50_2686 | 92.41 | FOA15_RS18980 | 88.33 |
| <i>nisF</i> | IAQ67_12815 | NA | NA | PPSQR21_025700 | 93.64 | C1A50_2683 | 93.50 | FOA15_RS18965 | 85.29 |
| <i>nisE</i> | IAQ67_12820 | NA | NA | PPSQR21_025710 | 88.66 | C1A50_2684 | 88.11 | FOA15_RS18970 | 81.06 |
| <i>nisG</i> | IAQ67_12825 | NA | NA | PPSQR21_025720 | 86.96 | C1A50_2685 | 86.96 | NA            | NA    |

NA = not available
