# Supplementary material for: Comparative Genomics Insights into a Novel Biocontrol Agent Paenibacillus peoriae Strain ZF390 against Bacterial Soft Rot
Source: MDPI journal article supplement (doi:10.3390/biology11081172), 2022-08-04
Supplement: s1 [file s1]

**Supplementary Table S3** Genomic features of *P. peoriae* ZF390 and other *Paenibacillus* strains.

| Features             | <i>P. peoriae</i> ZF390          | <i>P. peoriae</i> HS311       | <i>P. polymyxa</i> SQR-21 | <i>P. polymyxa</i> HY96-2 | <i>P. kribbensis</i> PS04 |
|----------------------|----------------------------------|-------------------------------|---------------------------|---------------------------|---------------------------|
| GeneBank sequence    | CP061172.1                       | CP011512.1                    | CP006872.1                | CP025957.1                | CP041731.1                |
| Size (Mb)            | 6.38                             | 6.22                          | 5.83                      | 5.75                      | 5.74                      |
| GC content (%)       | 44.99                            | 45.47                         | 45.60                     | 45.60                     | 46.80                     |
| Replicons            | One chromosome<br>Three plasmids | One chromosome<br>One plasmid | One chromosome            | One chromosome            | One chromosome            |
| Total genes          | 5,890                            | 5,537                         | 5,071                     | 4,943                     | 5,094                     |
| Predicted no. of CDS | 5,574                            | 5,265                         | 4,801                     | 4,648                     | 4,798                     |
| Ribosomal RNA        | 40                               | 39                            | 39                        | 42                        | 30                        |
| Transfer RNA         | 101                              | 100                           | 111                       | 110                       | 92                        |
| Other RNA            | 4                                | 4                             | 4                         | 4                         | 4                         |
| Pseudo genes         | 171                              | 129                           | 116                       | 139                       | 170                       |
