# Supplementary material for: Comparative Genomics Insights into a Novel Biocontrol Agent Paenibacillus peoriae Strain ZF390 against Bacterial Soft Rot
Source: MDPI journal article supplement (doi:10.3390/biology11081172), 2022-08-04
Supplement: s1 [file s1]

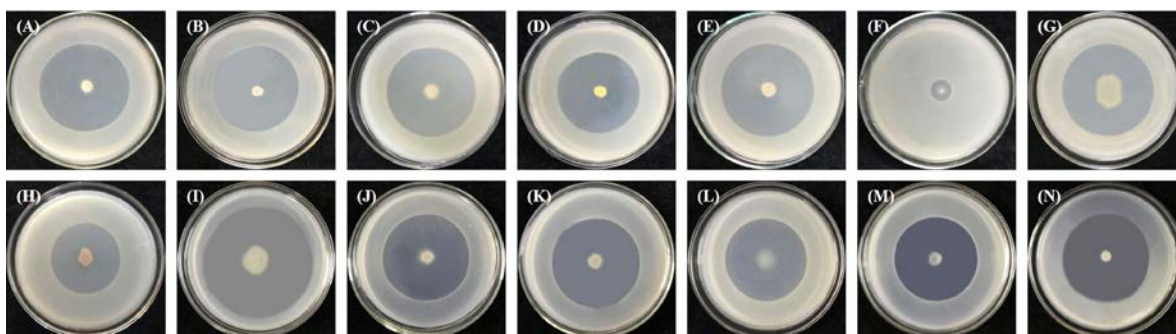

**Figure S1.** Inhibition zone of antagonistic strains against *Pbr* in plate assays. (A): ZF115; (B): ZF119; (C): ZF185; (D): ZF194; (E): ZF278; (F): ZF390; (G): ZF402; (H): ZF405; (I): ZF428; (J): ZF429; (K): ZF436; (L): ZF448; (M): ZF450; (N): ZF453.

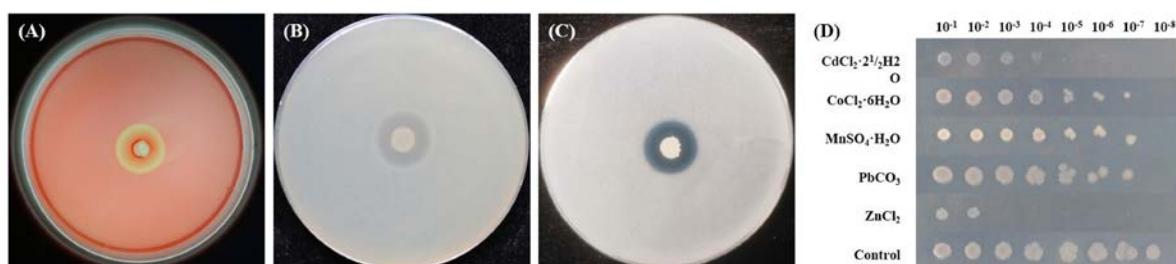

**Figure S2.** Plate assays for production of cellulase (A), protease (B) and phosphatase (C) by *Paenibacillus peoriae* ZF390 and heavy metal resistance of strain ZF390 (D).

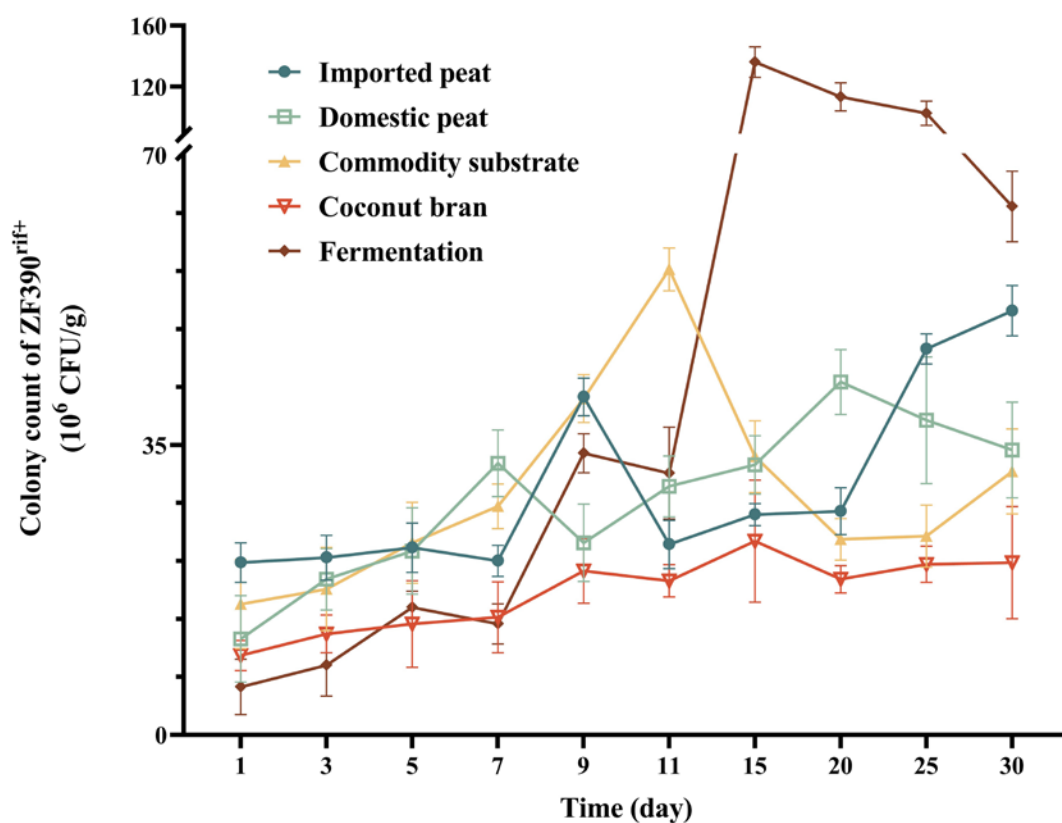

**Figure S3.** Colonization of the strain ZF390 in different types of soils.
