# Supplementary material for: Comparative Genomics Insights into a Novel Biocontrol Agent Paenibacillus peoriae Strain ZF390 against Bacterial Soft Rot
Source: MDPI journal article supplement (doi:10.3390/biology11081172), 2022-08-04
Supplement: s1 [file s1]

**Supplementary Table S6** Comparison of genes involved in plant growth promotion between strains ZF390, HS311, SQR-21, HY96-2 and PS04.

| Trait                    | Gene name   | ZF390       | HS311       | SQR-21         |                | HY96-2       |            | PS04          |               |              |
|--------------------------|-------------|-------------|-------------|----------------|----------------|--------------|------------|---------------|---------------|--------------|
|                          |             | Locus tag   | Locus tag   | Identity (%)   | Locus tag      | Identity (%) | Locus tag  | Identity (%)  | Locus tag     | Identity (%) |
| Phosphate solubilization | <i>phnE</i> | IAQ67_24275 | ABE82_21690 | 97.31          | PPSQR21_043880 | 92.28        | C1A50_4498 | 92.63         | FOA15_RS01880 | 90.41        |
|                          | <i>phnC</i> | IAQ67_24270 | ABE82_21685 | 97.80          | PPSQR21_043870 | 93.39        | C1A50_4497 | 93.00         | FOA15_RS01875 | 90.79        |
|                          | <i>pstB</i> | IAQ67_08060 | ABE82_08415 | 97.98          | PPSQR21_016690 | 90.39        | C1A50_1702 | 90.39         | FOA15_RS13995 | 87.78        |
|                          | <i>pstA</i> | IAQ67_08055 | ABE82_08410 | 98.33          | PPSQR21_016680 | 92.20        | C1A50_1701 | 92.20         | FOA15_RS13990 | 88.74        |
|                          | <i>pstC</i> | IAQ67_08050 | ABE82_08405 | 97.32          | PPSQR21_016670 | 93.78        | C1A50_1700 | 93.78         | FOA15_RS13985 | 90.25        |
|                          | <i>gndA</i> | IAQ67_18670 | ABE82_16080 | 98.01          | PPSQR21_031260 | 94.95        | C1A50_3272 | 94.81         | FOA15_RS21710 | 93.03        |
|                          | <i>gnd</i>  | IAQ67_10415 | ABE82_10835 | 96.53          | PPSQR21_021150 | 90.38        | C1A50_2157 | 90.49         | FOA15_RS16350 | 87.92        |
|                          | <i>gntK</i> | IAQ67_02200 | ABE82_02330 | 97.48          | PPSQR21_004580 | 90.06        | C1A50_0463 | 90.26         | FOA15_RS08185 | 88.64        |
|                          | <i>ppc</i>  | IAQ67_24795 | ABE82_22250 | 98.10          | PPSQR21_044780 | 91.26        | C1A50_4591 | 91.23         | FOA15_RS02325 | 89.15        |
|                          | <i>citZ</i> | IAQ67_08085 | ABE82_08440 | 98.11          | PPSQR21_016740 | 93.26        | C1A50_1707 | 93.26         | FOA15_RS14020 | 90.12        |
|                          | <i>gltB</i> | IAQ67_05685 | ABE82_05885 | 97.89          | PPSQR21_011790 | 92.69        | C1A50_1240 | 92.78         | FOA15_RS11615 | 90.63        |
|                          | <i>acnA</i> | IAQ67_03535 | ABE82_03720 | 96.78          | PPSQR21_007730 | 91.26        | C1A50_0814 | 91.30         | FOA15_RS09550 | 89.97        |
|                          | <i>sucC</i> | IAQ67_09630 | ABE82_10080 | 98.88          | PPSQR21_019530 | 94.14        | C1A50_2000 | 93.88         | FOA15_RS15585 | 93.54        |
|                          | <i>sucD</i> | IAQ67_09635 | ABE82_10085 | 97.53          | PPSQR21_019540 | 92.69        | C1A50_2001 | 92.58         | FOA15_RS15590 | 89.46        |
|                          | <i>sdhA</i> | IAQ67_22970 | ABE82_20370 | 97.59          | PPSQR21_041080 | 92.21        | C1A50_4187 | 91.92         | FOA15_RS00560 | 90.78        |
|                          | <i>sdhB</i> | IAQ67_22965 | ABE82_20365 | 98.05          | PPSQR21_041070 | 92.58        | C1A50_4186 | 92.58         | FOA15_RS00555 | 90.62        |
| <i>fumC</i>              | IAQ67_12970 | ABE82_13485 | 96.97       | PPSQR21_026040 | 91.50          | C1A50_2718   | 91.50      | FOA15_RS19135 | 88.11         |              |
| <i>mdh</i>               | IAQ67_08095 | ABE82_08450 | 97.56       | PPSQR21_016760 | 89.90          | C1A50_1709   | 89.90      | FOA15_RS14030 | 87.22         |              |

|             |             |             |       |                |       |            |       |               |       |
|-------------|-------------|-------------|-------|----------------|-------|------------|-------|---------------|-------|
| <i>pdhA</i> | IAQ67_13430 | ABE82_14010 | 98.88 | PPSQR21_026930 | 94.76 | C1A50_2807 | 94.66 | FOA15_RS19570 | 93.17 |
| <i>poxB</i> | IAQ67_10510 | ABE82_10925 | 97.57 | PPSQR21_021340 | 90.67 | C1A50_2177 | 90.55 | FOA15_RS16430 | 87.07 |
| <i>pflA</i> | IAQ67_18230 | ABE82_15645 | 99.21 | PPSQR21_030290 | 92.36 | C1A50_3173 | 93.02 | FOA15_RS21240 | 90.12 |
| <i>pflB</i> | IAQ67_18235 | ABE82_15650 | 98.59 | PPSQR21_030300 | 92.71 | C1A50_3174 | 92.71 | FOA15_RS21245 | 90.01 |
| <i>metG</i> | IAQ67_18210 | ABE82_15625 | 97.18 | PPSQR21_030250 | 90.05 | C1A50_3169 | 90.29 | FOA15_RS21220 | 89.85 |

NA = not available
