# Supplementary material for: Comparative Genomics Insights into a Novel Biocontrol Agent Paenibacillus peoriae Strain ZF390 against Bacterial Soft Rot
Source: MDPI journal article supplement (doi:10.3390/biology11081172), 2022-08-04
Supplement: s1 [file s1]

**Supplementary Table S1** Physiological and biochemical characteristics of strain ZF390.

| Characteristic       | ZF390 | KCTC 3763 <sup>T</sup> |
|----------------------|-------|------------------------|
| Casein hydrolysis    | +     | +                      |
| Arginine dihydrolase | -     | -                      |
| Indole production    | -     | -                      |
| Gelatin liquefaction | -     | +                      |
| Nitrate reduction    | -     | -                      |
| Acid produced from:  |       |                        |
| Glycerol             | +     | +                      |
| D-arabinose          | -     | -                      |
| L-arabinose          | +     | +                      |
| Ribose               | +     | +                      |
| D-xylose             | +     | +                      |
| Adonitol             | -     | -                      |
| Methylxyloside       | +     | +                      |
| D-fructose           | +     | +                      |
| Mannitol             | +     | +                      |
| Methyl-D-mannoside   | +     | +                      |
| Salicin              | +     | +                      |
| Maltose              | +     | +                      |
| D-trehalose          | -     | -                      |
| Gentiobiose          | +     | +                      |
| 2-keto-D-gluconate   | -     | -                      |
| 5-keto-D-gluconate   | -     | -                      |
| Rhamnose             | -     | -                      |
| D-turanose           | +     | -                      |
| N-acetylglucosamine  | +     | +                      |
